# Supplementary material for: Probing energy losses from dye desorption in cobalt complex-based dye-sensitized solar cells
Source: Royal Society of Chemistry journal article supplement (doi:10.1039/c7cp07494h), 2018-01-01
Supplement: c7cp07494h1.pdf [file c7cp07494h1.pdf]

## Electronic Supplementary Information

# Probing energy losses from dye desorption in cobalt complex based dye-sensitized solar cells

**Yan Zhang, Yungen Wu, Zhe Sun,\* Yanan Kang, Tianyang Chen, Hui Wang, Mao  
Liang and Song Xue\***

*Tianjin Key Laboratory of Organic Solar Cells and Photochemical Conversion, School of Chemistry &  
Chemical Engineering, Tianjin University of Technology, Tianjin 300384, P. R. China.*

*Fax: +86-22-60214252*

*Tel: +86-22-60214250*

*E-mail: zhesun@tjut.edu.cn, xuesong@ustc.edu.cn;*

### List of Contents

|                                                                                                                |     |
|----------------------------------------------------------------------------------------------------------------|-----|
| 1. Photophysical and electrochemical parameters for dye M26.....                                               | S1  |
| 2. Variation of light absorption spectrum of the M26 sensitized TiO <sub>2</sub> film under HCl treatment..... | S3  |
| 3. Absorption coefficient and light harvesting efficiency at the wavelength of 630 nm.....                     | S3  |
| 4. Details on the fits to the curves of electron density versus the Fermi-level.....                           | S4  |
| 5. Derivation of equation 5.....                                                                               | S6  |
| 6. Reaction-diffusion model for simulating DSCs and numerical details.....                                     | S7  |
| 7. Effect of the conduction band edge shift on absorbed photon conversion efficiency.....                      | S12 |
| 8. Dependence of recombination constant on dye loading.....                                                    | S12 |
| References .....                                                                                               | S13 |

## 1. Photophysical and electrochemical parameters for dye M26

**Table 1 Photophysical and electrochemical data for dye M26.**

| Dye | $\lambda_{\max}/\text{nm}^a$ | $\lambda_{\max}/\text{nm}^b$ | $\varepsilon/10^3 \text{ M}^{-1} \text{ cm}^{-1}$ | $E_{0-0}/\text{eV}^c$ | HOMO /V vs NHE <sup>d</sup> | LUMO /V vs NHE <sup>e</sup> |
|-----|------------------------------|------------------------------|---------------------------------------------------|-----------------------|-----------------------------|-----------------------------|
| M26 | 532                          | 489                          | 19.2                                              | 2.16                  | 0.99                        | -1.17                       |

<sup>a</sup>Absorption spectra of dye M26 in dichloromethane (DCM). <sup>b</sup>Absorption spectra of dye N26 anchoring in TiO<sub>2</sub> film. <sup>c</sup> $E_{0-0}$  was estimated from the intersection of the normalized absorption and emission spectra in dichloromethane (DCM) solution. <sup>d</sup>HOMO is estimated as the average of anodic and cathodic peak potentials. <sup>e</sup>LUMO is calculated by reducing optical transition energy ( $E_{0-0}$ ) from oxidation potential (HOMO)

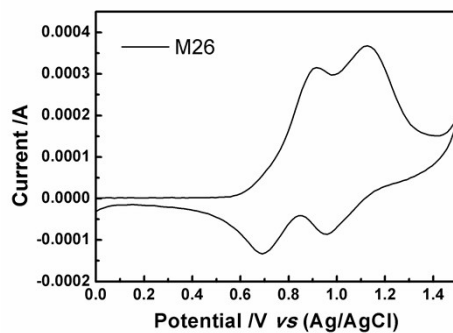

**Fig. S1** Cyclic voltammograms of M26 sensitized electrodes.

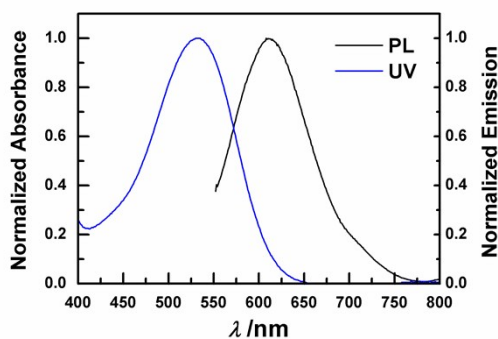

**Fig. S2** Normalized absorption and emission spectra of the dyes in DCM.

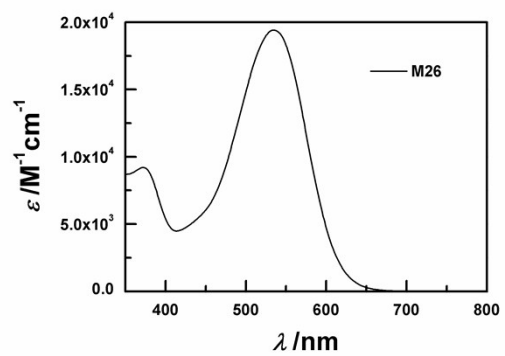

**Fig. S3** Absorption spectra of dye M26 in DCM.

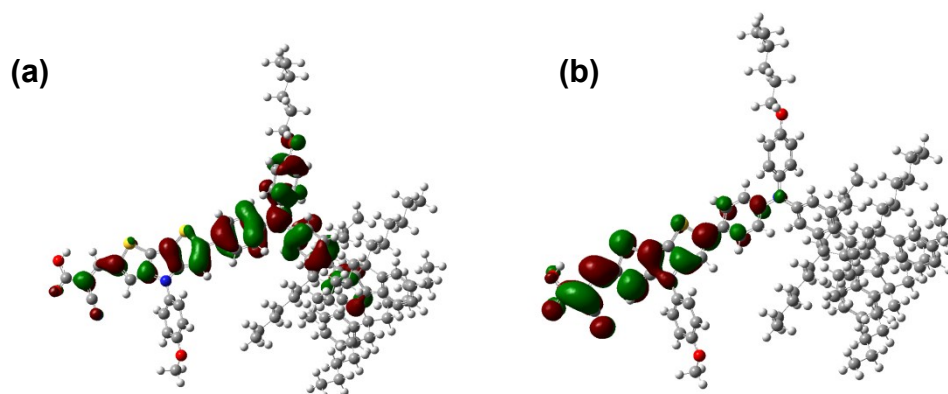

**Fig. S4** Isodensity surface plots for the HOMO (a) and LUMO (b) of dye M26.

## 2. Variation of light absorption spectrum of the M26 sensitized TiO<sub>2</sub> film under HCl treatment

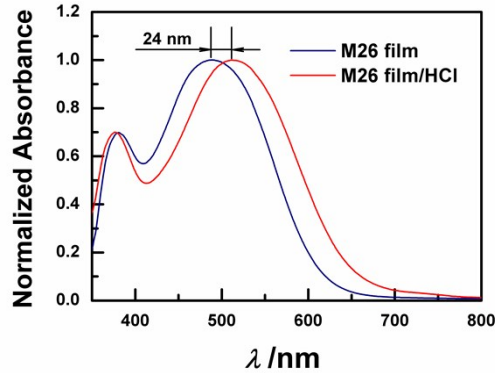

**Fig. S5** Absorption spectra of dye M26 sensitized TiO<sub>2</sub> film and its light response after treated with HCl solution

## 3. Absorption coefficient and light harvesting efficiency at the wavelength of 630 nm

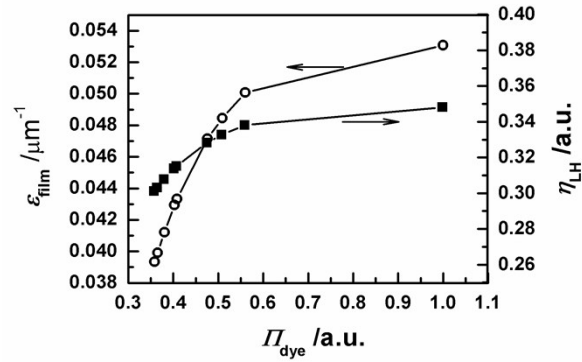

**Fig. S6** Dependence of absorption coefficient and light harvesting efficiency on normalized dye loading. Wavelength of incident LED is 630 nm.

#### 4. Details on the fits to the curve of electron density versus the Fermi-level using biexponential distribution function

To make good fits to the  $n-E_{F,n}$  curves, biexponential distribution equation is simplified as follows,

$$n = \sum_{i=s,d} P_i \exp\left(\alpha_i \frac{E_{F,n}}{k_B T}\right) \quad (S1)$$

where prefactor  $P_i$  is given by

$$P_i = N_{T,i} \exp\left(\alpha_i \frac{-E_c}{k_B T}\right) \quad (S2)$$

Here subscripts “s” and “d” in eqn (S1) stand for deep and shallow traps, respectively. As illustrated in Fig. S8, the  $n-E_{F,n}$  curve is well fitted by eqn (S1). The fitting results are summarized in Table S2. One can see that  $\alpha_s$  is nearly invariant to  $\Pi_{\text{dye}}$ . Thereby, the shift of the conduction band edge ( $\Delta E_c$ ) with respect to  $\Pi_{\text{dye}}$  can be estimated by assuming the invariance of the density of shallow trap states. That is given by

$$\Delta E_c = \frac{k_B T}{\bar{\alpha}_s} \ln \frac{P_s^1}{P_s^2} \quad (S3)$$

where  $\bar{\alpha}_s$  is the average of  $\alpha_s$ , which equals to 0.498 according to fitting results.

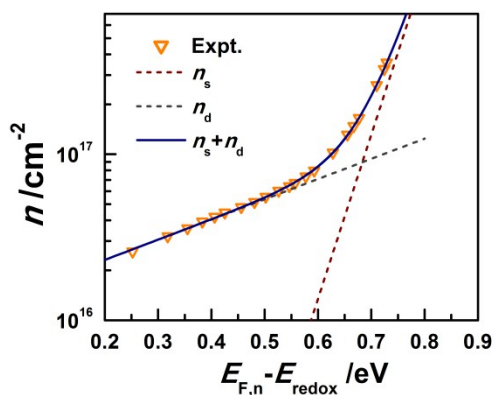

**Fig. S7** Best fits to the  $n-E_{F,n}$  curve of the DSCs with relative dye loading of 0.47 using a biexponential distribution function. Gray and red dashed lines represent the fitted distributions of the electrons at deep-trapping states ( $n_d$ ), shallow-trapping states ( $n_s$ ), respectively.

**Table 2** Fitted parameters for the  $n-E_{F,n}$  curves.

| $\Pi_{\text{dye}}$ | $P_s / 1 \times 10^{10}$ | $\alpha_s$ | $P_d / 1 \times 10^{16}$ | $\alpha_d$ | $R^2$ |
|--------------------|--------------------------|------------|--------------------------|------------|-------|
| 1.00               | 0.55                     | 0.497      | 3.05                     | 0.045      | 0.997 |
| 0.64               | 0.87                     | 0.497      | 1.98                     | 0.045      | 0.999 |
| 0.52               | 1.18                     | 0.500      | 2.38                     | 0.042      | 0.999 |
| 0.47               | 1.52                     | 0.499      | 1.81                     | 0.051      | 0.999 |
| 0.43               | 2.51                     | 0.496      | 1.70                     | 0.058      | 0.999 |
| 0.40               | 2.78                     | 0.496      | 1.50                     | 0.058      | 0.999 |
| 0.34               | 3.03                     | 0.506      | 1.68                     | 0.050      | 0.998 |
| 0.33               | 4.04                     | 0.498      | 1.37                     | 0.063      | 0.998 |
| 0.31               | 6.47                     | 0.496      | 1.47                     | 0.052      | 0.999 |

## 5. Derivation of Equation 4

The rate of recombination reaction between injected electrons and the oxidized species in electrolyte can be formulated as follows,

$$U_{\text{rec}} = k_r n_c^\beta \quad (\text{S4})$$

where  $U_{\text{rec}}$  represents recombination rate,  $n_c$  is the density of the conduction band electrons,  $\beta$  is ideality factor,  $k_r$  is recombination rate constant. When DSC is at open circuit, the injected electrons are absolutely consumed by the combination reaction. Thereby, eqn (S4) can be rewritten as

$$I_0 \eta_{\text{inj}} \eta_{\text{LH}} = k_r N_c^\beta \exp\left[\frac{q\beta}{k_B T} (E_{\text{F,n}} - E_c)\right] \quad (\text{S5})$$

where  $I_0$  is illumination intensity,  $\eta_{\text{inj}}$  is electron injection efficiency,  $\eta_{\text{LH}}$  is light harvesting efficiency,  $E_c$  is the conduction band edge,  $N_c$  is the density of the conduction band,  $k_B$  is the Boltzmann constant,  $T$  is the absolute temperature and  $q$  is elementary charge. Note that  $n_c$  in eqn (S5) is expressed as the function of the Fermi-level. By replacing the Fermi-level with  $V_{\text{oc}}$ , one can find,

$$V_{\text{oc}} = E_c + \frac{k_B T}{\beta q} \ln \frac{I_0 \eta_{\text{LH}} \eta_{\text{inj}}}{k_r N_c} \quad (\text{S6})$$

If the variation of  $V_{\text{oc}}$ , i.e.  $\Delta V_{\text{oc}}$ , is relative to the band edge shift, light absorption efficiency, or other kinetic factors,  $\Delta V_{\text{oc}}$  is decomposed into follows,

$$\Delta V_{\text{oc}} = \Delta E_c - \Delta E_k + \Delta E_{\text{LH}} \quad (\text{S7})$$

where  $\Delta E_k$  is given by

$$\Delta E_k = \frac{k_B T}{q} \Delta \frac{\ln k_r}{\beta} \quad (\text{S8})$$

and  $\Delta E_{\text{LH}}$  is written as

$$\Delta E_{\text{LH}} = \frac{k_{\text{B}}T}{q} \Delta \frac{\ln \eta_{\text{LH}}}{\beta} \quad (\text{S9})$$

It is seen that we exclude the contribution of  $\eta_{\text{inj}}$  to  $\Delta V_{\text{oc}}$  in eqn (S7). This is justified for the DSCs under the treatment of dye desorption.

## 6. Reaction-diffusion model for simulating DSCs and numerical details

Reaction-diffusion model was employed in this work for mimicking the  $j$ - $V$  response of cobalt complex based DSCs at different dye loading. Briefly, this model describes four photoelectrochemical processes: (1) the injection of photo-generated electrons, (2) the diffusion of the injected electrons across  $\text{TiO}_2$  film, (3) interfacial recombination reaction, and (4) the recovery of electron receptors at counter electrode. When cobalt complex based DSCs operate at steady state, the transport of conduction band electrons is formulated by a time-independent equation in one dimension,<sup>[S1]</sup>

$$D_{\text{c}} \frac{\partial^2 n_{\text{c}}}{\partial x^2} - U_{\text{rec}} + G_{\text{in}} = 0 \quad (\text{S10})$$

where  $D_{\text{c}}$  is the diffusion coefficient of conduction band electrons,  $U_{\text{rec}}$  is the recombination rate,  $G_{\text{in}}$  is the rate of electron injection. Normally,  $n_{\text{c}}$  is estimated according to the quasi-Fermi level of  $\text{TiO}_2$ , that is

$$n_{\text{c}} = N_{\text{c}} \exp\left(\frac{E_{\text{F,n}} - E_{\text{c}}}{k_{\text{B}}T}\right) \quad (\text{S11})$$



where  $E_c$  is the energy level of the band edge,  $N_c$  is the density of the states at the conduction band,  $k_B$  is the Boltzmann constant, and  $T$  is the absolute temperature.

The recombination reaction is assumed to satisfy the empirical relation,<sup>[S2]</sup> which is written as

$$U_{\text{rec}} = k_r n_{\text{ox}} n_c^b \quad (\text{S12})$$

where  $n_{\text{ox}}$  is the concentration of electron receptor in electrolyte,  $k_r$  is rate constant of recombination reaction, and  $b$  is the apparent reaction order.

Considering the exponential decay of the absorption of dye-soaked  $\text{TiO}_2$  film, electron injection rate in eqn (1) is given by

$$G_{\text{in}} = I_0 \eta_{\text{inj}} \varepsilon_{\text{film}} \exp(-\varepsilon_{\text{film}} x) \quad (\text{S13})$$

where  $I_0$  is incident photon flux,  $\eta_{\text{inj}}$  is electron injection efficiency, and  $\varepsilon_{\text{film}}$  is adsorption coefficient.

The kinetic equations for the diffusion-reaction of the redox shuttles in electrolyte are given as eqns (S14) and (S15),

$$D_{\text{ox}} \frac{\partial^2 n_{\text{ox}}}{\partial x^2} - U_{\text{rec}} + G_{\text{in}} = 0 \quad (\text{S14})$$

$$D_{\text{re}} \frac{\partial^2 n_{\text{re}}}{\partial x^2} - G_{\text{in}} = 0 \quad (\text{S15})$$

where  $n_{\text{ox}}$  and  $n_{\text{re}}$  represents the mole concentrations for the oxidized form (receptor) and the reduced form (donor) in redox shuttles, respectively.

Eqns (S10), (S14), and (S15) in this work are employed for determining density profiles of the conduction band electrons and redox couples at steady condition. In the numerical calculations, we

applied reflective boundary conditions for  $n_c$ ,  $n_{ox}$ , and  $n_{re}$ , i.e.  $\nabla n_c|_{x=d} = 0$ ,  $\nabla n_{re}|_{x=0} = 0$ ,  $\nabla n_{ox}|_{x=0} = 0$ . At the contact between TiO<sub>2</sub> film and TCO sheet ( $x=0$ ), the interfacial density of the conduction band electron ( $n_c^0$ ) is related to its Fermi-level ( $E_{F,n}^0$ ). And the latter depends on bias voltage ( $V$ ) and the energy level of counter electrode ( $E_{F,redox}$ ) by the expression of  $E_{F,n}^0 = qV + E_{F,redox}$ , where  $q$  is the elementary charge. According to the definition,  $E_{F,redox}$  is written as

$$E_{F,redox} = k_B T \ln \left( \frac{n_{ox}^{eq} - n_{ox}^{CE}}{n_{ox}^{CE}} \right) \quad (S16)$$

where  $n_{ox}^{CE}$  and  $n_{ox}^{eq}$  are the concentrations of the receptors at counter electrode ( $x=d+d_{el}$ ) under illumination and in the dark, respectively. Current density is estimated by the expression of  $j=qD_c \nabla n_c^0$  after calculating the density profiles. The absorbed photon conversion efficiency ( $\eta_{APCE}$ ) at short circuit is then obtained,

$$\eta_{APCE} = \frac{j}{I_0(1 - \exp(-\varepsilon_{film}d))} \quad (S17)$$

These equations were solved numerically in one dimension by using Clark-Nicolson method. Experimental data of  $E_c$ ,  $b$ ,  $\varepsilon_{film}$ ,  $d$ , and  $\eta_{APCE}$  etc. at a given dye loading were employed for solving  $k_r$  via a relaxation iteration scheme. To be specific, an initial value of  $k_r$  is estimated to yield a numerical result of  $\eta_{APCE}^n$  by solving the equation set. Subsequently, the obtained  $\eta_{APCE}^n$  is applied for generating a new guess of  $k_r^n$  with the aid of standard relaxation form.

$$k_r^n = k_r \times \left[ 1 + \xi \left( \eta_{APCE}^n - \eta_{APCE}^{expt} \right) / \eta_{APCE}^{expt} \right] \quad (S18)$$

where  $\eta_{\text{APCE}}^{\text{expt}}$  is the experimental data of  $\eta_{\text{APCE}}$ ,  $\zeta$  is the relaxation factor. In our simulations, the value of  $\zeta$  is chosen as 0.5. The  $k_r^n$  is then used to calculate next  $\eta_{\text{APCE}}^n$ . Such process is repeated until the following criterion of convergence reaches,

$$\left| 1 - \frac{\eta_{\text{APCE}}^n}{\eta_{\text{APCE}}} \right| \leq 10^{-4} \quad (\text{S19})$$

As  $k_r$  is calculated, we also obtain the density profiles of the conduction band electrons ( $n_c$ ) and electron receptors ( $n_{\text{ox}}$ ). The diffusion length ( $L_n$ ) is usually defined by<sup>[S3]</sup>

$$L_n = \sqrt{D_c \tau_n} \quad (\text{S20})$$

where  $\tau_n$  is the electron lifetime depending on the density of the conduction band electrons,

$$\tau_n = (k_r n_c^{\beta-1} n_{\text{ox}})^{-1} \quad (\text{S21})$$

As shown above,  $n_c$  varies with the position of the device. It implies  $\tau_n$  has to be estimated as its average over the  $\text{TiO}_2$  film. Therefore,  $L_n$  is calculated by inserting eq S1 into eq 20. Usually, charge collection efficiency is correlated to the ratio between  $L_n$  and film thickness. It follows that  $L_n/d$  is expressed as

$$\frac{L_n}{d} = \sqrt{\frac{D_c}{d \int_0^d k_r n_c^{\beta-1} n_{\text{ox}} dx}} \quad (\text{S22})$$

The employed parameters in the simulations are summarized in Table 3.

**Table 3. Parameters used in the simulation<sup>a</sup>**

| Parameter                                              | Symbol                      | Value                | Unit                        |
|--------------------------------------------------------|-----------------------------|----------------------|-----------------------------|
| Conduction band edge                                   | $E_c$                       | Expt.                | eV                          |
| Reaction order of recombination                        | $b$                         | Expt.                | –                           |
| Absorption coefficient                                 | $\varepsilon_{\text{film}}$ | Expt.                | $\mu\text{m}^{-1}$          |
| Film thickness                                         | $d$                         | Expt.                | $\mu\text{m}$               |
| Absorbed photon conversion efficiency                  | $\eta_{\text{APCE}}$        | Expt.                | –                           |
| Light intensity                                        | $I_0$                       | Expt.                | $\text{cm}^{-2}$            |
| Density of the Conduction band                         | $N_c$                       | $7 \times 10^{20}$   | $\text{cm}^{-3}$            |
| Density of the Shallow Trapping states                 | $N_s$                       | $2 \times 10^{20}$   | $\text{cm}^{-3}$            |
| Diffusion coefficient of the conduction band electrons | $D_c$                       | 0.5                  | $\text{cm}^2 \text{s}^{-1}$ |
| Diffusion coefficient for electron receptors           | $D_{\text{ox}}$             | $3.6 \times 10^{-5}$ | $\text{cm}^2 \text{s}^{-1}$ |
| Diffusion coefficient for electron donors              | $D_{\text{re}}$             | $4.4 \times 10^{-5}$ | $\text{cm}^2 \text{s}^{-1}$ |
| Porosity                                               | $p$                         | 0.6                  | –                           |
| Thickness of electrolyte layer                         | $d_{\text{el}}$             | 10                   | $\mu\text{m}$               |
| Temperature                                            | $T$                         | 293.15               | K                           |

<sup>a</sup> Experimental data are shown in the text.

## 7. Effect of the conduction band edge shift on absorbed photon conversion efficiency

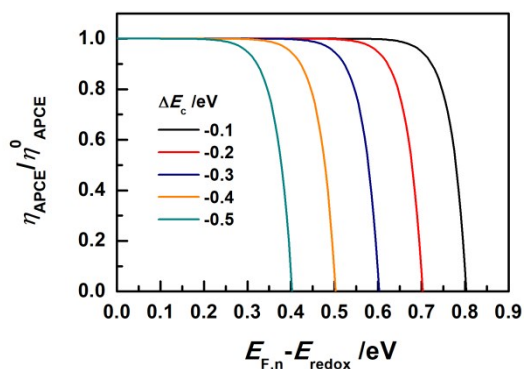

**Fig. S8** Simulation results on the relation between positive band edge shift and the reduction of absorbed photon conversion efficiency. The  $\eta_{\text{APCE}}^0$  stands for the  $\eta_{\text{APCE}}$  at the original band edge ( $E_c^0$ ). Simulation parameters:  $b=0.72$ ,  $E_c^0=1.11$  V,  $k_r=1.26 \times 10^{-11}$  cm<sup>3b</sup> s<sup>-1</sup>, and  $I_0=20$  mW cm<sup>-2</sup>.

## 8. Dependence of recombination constant on dye loading

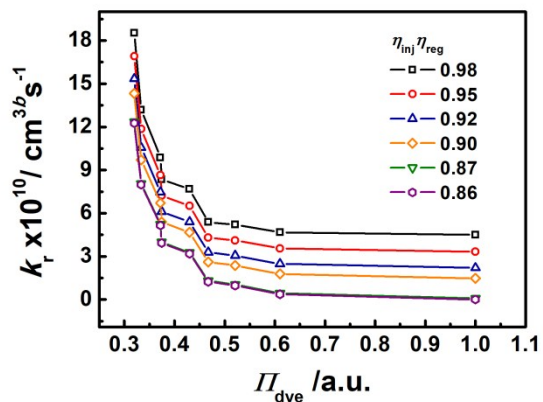

**Fig. S9** Dependence of recombination constant on dye loading. Note that the experimental value of  $\eta_{\text{APCE}}$  is 0.857 at  $\Pi_{\text{dye}}=1.0$ , which means  $\eta_{\text{inj}} \eta_{\text{reg}}$  is in the range from 1.0 to 0.857.

## References

- (S1) J. Ferber, R. Stangl and J. Luther, *Sol. Energy Mater. Sol. Cells*, 1998, **53**, 29–54.
- (S2) P. R. F. Barnes, A. Y. Anderson, J. R. Durrant and B. C. O'Regan, *Phys. Chem. Chem. Phys.*, 2011, **13**, 5798–5816.
- (S3) J. Bisquert and I. Mora-Seró, *J. Phys. Chem. Lett.*, 2010, **1**, 450–456.
